# Supplementary material for: Temporary reduction in daily global CO2 emissions during the COVID-19 forced confinement
Source: Springer Nature journal article supplement (doi:10.1038/s41558-020-0797-x), 2020-05-19
Supplement: 41558_2020_797_MOESM1_ESM.pdf [file 41558_2020_797_MOESM1_ESM.pdf]

In the format provided by the authors and unedited.

# Temporary reduction in daily global CO<sub>2</sub> emissions during the COVID-19 forced confinement

Corinne Le Quéré <sup>1,2</sup> , Robert B. Jackson <sup>3,4,5</sup>, Matthew W. Jones <sup>1,2</sup>, Adam J. P. Smith<sup>1,2</sup>, Sam Abernethy <sup>3,6</sup>, Robbie M. Andrew <sup>7</sup>, Anthony J. De-Gol<sup>1,2</sup>, David R. Willis<sup>1,2</sup>, Yuli Shan<sup>8</sup>, Josep G. Canadell <sup>9</sup>, Pierre Friedlingstein <sup>10,11</sup>, Felix Creutzig <sup>12,13</sup> and Glen P. Peters <sup>7</sup>

---

<sup>1</sup>School of Environmental Sciences, University of East Anglia, Norwich, UK. <sup>2</sup>Tyndall Centre for Climate Change Research, University of East Anglia, Norwich, UK. <sup>3</sup>Earth System Science Department, Stanford University, Stanford, CA, USA. <sup>4</sup>Woods Institute for the Environment, Stanford University, Stanford, CA, USA. <sup>5</sup>Precourt Institute for Energy, Stanford University, Stanford, CA, USA. <sup>6</sup>Applied Physics Department, Stanford University, Stanford, CA, USA. <sup>7</sup>CICERO Center for International Climate Research, Oslo, Norway. <sup>8</sup>Integrated Research for Energy, Environment and Society (IREES), Energy and Sustainability Research Institute Groningen University of Groningen, Groningen, the Netherlands. <sup>9</sup>Global Carbon Project, CSIRO Oceans and Atmosphere, Canberra, Australia. <sup>10</sup>College of Engineering, Mathematics and Physical Sciences, University of Exeter, Exeter, UK. <sup>11</sup>LMD, IPSL, ENS, PSL Université, École Polytechnique, Institut Polytechnique de Paris, Sorbonne Université, CNRS, Paris, France. <sup>12</sup>Mercator Research Institute on Global Commons and Climate Change, Berlin, Germany. <sup>13</sup>Technical University Berlin, Berlin, Germany. <sup>✉</sup>e-mail: [c.lequere@uea.ac.uk](mailto:c.lequere@uea.ac.uk)

# Temporary reduction in daily global CO<sub>2</sub> emissions during the COVID-19 forced confinement

Corinne Le Quéré<sup>1,2</sup>, Robert B. Jackson<sup>3,4,5</sup>, Matthew W. Jones<sup>1,2</sup>, Adam J. P. Smith<sup>1,2</sup>, Sam Abernethy<sup>3,6</sup>, Robbie M. Andrew<sup>7</sup>, Anthony J. De-Gol<sup>1,2</sup>, David R. Willis<sup>1,2</sup>, Yuli Shan<sup>8</sup>, Josep G. Canadell<sup>9</sup>, Pierre Friedlingstein<sup>10,11</sup>, Felix Creutzig<sup>12,13</sup>, Glen P. Peters<sup>7</sup>

<sup>1</sup>School of Environmental Sciences, University of East Anglia, Norwich, UK.

<sup>2</sup>Tyndall Centre for Climate Change Research, University of East Anglia, Norwich, UK.

<sup>3</sup>Earth System Science Department, Stanford University, Stanford, CA USA.

<sup>4</sup>Woods Institute for the Environment, Stanford University, Stanford, CA USA.

<sup>5</sup>Precourt Institute for Energy, Stanford University, Stanford, CA USA.

<sup>6</sup>Applied Physics Department, Stanford University, Stanford, CA USA.

<sup>7</sup>CICERO Center for International Climate Research, Oslo, Norway.

<sup>8</sup>Integrated Research for Energy, Environment and Society, Energy and Sustainability Research Institute Groningen, University of Groningen, Groningen 9747 AG, the Netherlands.

<sup>9</sup>Global Carbon Project, CSIRO Oceans and Atmosphere, Canberra, Australia.

<sup>10</sup>College of Engineering, Mathematics and Physical Sciences, University of Exeter, Exeter EX4 4QF, UK.

<sup>11</sup>LMD/IPSL, ENS, PSL Université, École Polytechnique, Institut Polytechnique de Paris, Sorbonne Université, CNRS, Paris France.

<sup>12</sup>Mercator Research Institute on Global Commons and Climate Change, Berlin Germany.

<sup>13</sup>Technical University Berlin, Berlin Germany

\*e-mail: c.lequere@uea.ac.uk

## Supplementary Information

### Table of Contents

|                                                                |           |
|----------------------------------------------------------------|-----------|
| <b>1. Extended methods</b> .....                               | <b>2</b>  |
| 1.1. Updated 2019 global fossil CO <sub>2</sub> emissions..... | 2         |
| 1.2. Confinement Index .....                                   | 2         |
| 1.3. Seasonal and weekly adjustment.....                       | 3         |
| 1.4. Parameters values.....                                    | 4         |
| 1.4.1. Power sector.....                                       | 4         |
| 1.4.2. Industry sector .....                                   | 6         |
| 1.4.3. Surface transport sector.....                           | 7         |
| 1.4.4. Public sector .....                                     | 10        |
| 1.4.5. Residential sector .....                                | 10        |
| 1.4.6. Aviation sector .....                                   | 11        |
| <b>2. Additional tables of results</b> .....                   | <b>12</b> |
| <b>3. Comparison to Earth Observations</b> .....               | <b>13</b> |
| <b>4. Scenario Figures</b> .....                               | <b>15</b> |
| <b>5. Country, provinces and state details</b> .....           | <b>16</b> |

# 1. Extended methods

## 1.1. Updated 2019 global fossil CO<sub>2</sub> emissions

Extending the approach used by Friedlingstein et al 2019<sup>1</sup>, we update estimates of global fossil CO<sub>2</sub> emissions growth in 2019 based on revised and newer data from China, US, EU, India, and updated estimates of economic growth from IMF<sup>2</sup>. This update produces an estimated growth rate of global CO<sub>2</sub> emissions in 2019 of +0.1% (−0.5% to +0.6%), compared to +0.6% (−0.2% to +1.5%) projected in November 2019<sup>1,3</sup>. Likewise the updated growth in 2019 emissions is: +2.0% for China, compared to +2.6% (+0.7% to +4.4%); −2.6% for the US, compared to −1.7% (−3.7% to +0.3%); −3.9% (−5.4% to −2.4%) for EU28, compared to −1.7% (−3.4% to +0.1%); +1.0% (+0.7% to +1.3%) for India, compared to +1.8% (+0.7% to +3.7%); and +0.5 (−0.8% to +1.9%) for the rest of the world, compared to +0.5% (−0.8% to +1.8%). Revised estimates are for a decrease in coal in 2019 by −2.0%, and increases in oil and natural gas of 0.6% and 2.6%, respectively.

## 1.2. Confinement Index

To define the confinement index (CI) a detailed online search of government websites, news articles and Wikipedia was undertaken to identify the full range of policies that have been applied to tackle the COVID-19 outbreak. These policies were ordered by the timing in which they were typically applied to strengthen a nation's response, while policies with the potential to impact CO<sub>2</sub> emissions were highlighted. Three groups of policies were formed, based on the range of people impacted and the perceived restriction of daily activities, corresponding to a progressive reduction of CO<sub>2</sub> emissions.

A subsequent online search was undertaken for each country, in order of COVID-19 outbreak severity and CO<sub>2</sub> emissions, to identify dates that confinement policies were introduced. Up to 19<sup>th</sup> April, the date each country transitioned between CI levels was recorded, including as countries descend levels when policies are relaxed. Information from government websites was prioritised, while information from news articles and Wikipedia that was more readily accessible, was fact-checked wherever possible. Despite efforts to maintain a consistent approach, there remains some uncertainty where countries introduce multiple policies from one CI level over multiple days. In these situations, the date of the policy with the greatest impact on CO<sub>2</sub> emissions was selected or, if information was lacking, a median date was selected. The analysis was undertaken by one researcher to consistently allocate dates that countries move between CI levels.

For China and the USA analysis was conducted at State or Province level while other countries were analysed at national level. To further improve the quality of the analysis, the most populous cities in each country were analysed individually to capture local variation in the date policies were introduced. Analysis over China provinces were cross-checked by two people. When the CI was needed over aggregated region (e.g. for the whole of China or USA), the index was weighted with the emissions of the regions, and the closest CI was used.

We have cross-checked our confinement index with that produced in parallel by Oxford University, called OxCGRT<sup>4</sup>, which looks at 13 indicators of government response and is broader in its intended use (while we focus on those measures that have an impact on CO<sub>2</sub> emissions only). To compare our database to the Oxford study we applied a logic that matched policy interventions as closely as possible and cross-plotted those dates in order to

detect bias in the data. For the four policies that are most similar to both studies, there is no bias and the mean difference between the studies is  $-0.65 \pm 5.36$  days for CI3 and  $-0.17 \pm 5.47$  days for CI2. Given the difficulty grouping policies into three confinement levels, some differences were expected. The outliers were therefore investigated manually, and our CI was updated when appropriate. Following these changes, comparing the remaining differences between the two datasets, the mean difference for CI3 reduced to  $0.09 \pm 0.87$  days, while for CI2 the difference reduced to  $0.02 \pm 1.66$  days.

### 1.3. Seasonal and weekly adjustment

All input data are representative of changes compared to a typical day prior to confinement, taking into account seasonality and day of the week. The changes were calculated differently depending on the data available and the causes of the seasonality and weekly variability. The choices of method are detailed for each data stream, and was primarily dictated by the availability of the data. Some data sources are provided in each section below, with details of the additional processing provided in this section.

The treatment for the data for European countries electricity demand (load) is as follows. The data was obtained from the European Network of Transmission System Operators for Electricity<sup>5</sup> (ENTSOE). Aggregate daily loads were calculated by taking daily mean power demands and outputs and multiplying by 24 hours to obtain MWhrs. In order to obtain an anomaly measure that removes a signal for the weekly cycle, the difference between the daily load is compared to the average of the previous 5-years for the closest day-of-the week to the date in question. ENTSOE electricity data was temperature adjusted to take into account variability caused by heating. We use Heating Degree Days (HDD) defined as the outside temperature below a threshold of  $15.5^{\circ}\text{C}$  multiplied by the time outside of the respective threshold<sup>6 7</sup>. To obtain the most recent temperature measures, ERA5<sup>8</sup> reanalysis data for air temperature at 2m was taken ( $0.25^{\circ}\times 0.25^{\circ}$ , hourly) up to 17 April 2020, and bias corrected with the measured Climatic Research Unit time-series version 4.03 (CRU-TSv4.03)<sup>9</sup> ( $0.5^{\circ}\times 0.5^{\circ}$ , hourly) for the period 2001-2018. A population-weighted HDD was calculated hourly at a  $0.5^{\circ}$  spatial resolution, and combined for a timezone-corrected daily average for each country.

The electricity data for India from POSOCO<sup>10</sup> was also compared to the previous 5-years for the closest day-of-the week to the date in question. The average was normalised to January values for year 2020 to remove the bias from growth in electricity use in recent years.

The U.S. daily electricity demand data were sourced from the Energy Information Administration<sup>11</sup> (EIA) and downloaded for 13 regions, covering the 48 contiguous states (i.e. excluding Alaska & Hawaii). The following states were used for each regions, organized by Independent System Operator (ISO) or other relevant body: Electric Reliability Council of Texas (ERCOT): *Texas Region*: Texas; Florida Reliability Coordinating Council: *Florida region*: Florida ; Midcontinent ISO: *Midwest region*: North Dakota, Minnesota, Wisconsin, Michigan, Iowa, Missouri, Illinois, Arkansas, Louisiana ; New England ISO: *New England region*: Maine, New Hampshire, Vermont, Massachusetts, Rhode Island; New York ISO: *New York Region*: New York; PJM: *Mid Atlantic region*: Pennsylvania, New Jersey, Delaware, Maryland, Ohio, Kentucky, West Virginia, Virginia; SERC Reliability Corporation: *Carolinas region*: North Carolina, South Carolina; *Southeast region*: Georgia, Alabama; *Tennessee region*: Tennessee; Southwest Power Pool (SPP): *Central region*: North Dakota, South Dakota, Nebraska, Kansas, Oklahoma; Western Electricity Coordinating Council (WECC), including California ISO: *California region*: California: *Northwest Region*: Washington, Idaho, Montana, Oregon, Wyoming, Nevada, Utah, Colorado; *Southwest Region*: Arizona, New Mexico.

The data on coal consumption in China was taken from Myllyvirta (2020<sup>12</sup>). It averages coal consumption for the 6 main providers of electricity from the WIND platform

(<https://www.wind.com.cn/en/>). Daily averages were obtained from 2014-2020 with anomaly data taken as the difference between the 5-year average for the day of the year relative to the Chinese New Year and the day in question, to minimise the effect of the event on the anomaly signal. The average was normalised to January values for year 2020 to remove the bias from growth in coal consumption in recent years.

## 1.4. Parameters values

The parameters for the change in activity level ( $\Delta A^s$  in Eq. 1) were estimated based on a range of data for energy or activity use. Details of the calculations are given below for each sector, but the general approach is to compare 2020 data to a reference level prior to the COVID-19 pandemic. The reference level is either levels for 2019 or the average of 2015-2019 to obtain a percent change, or sometimes pre-pandemic days (e.g. January 2020) depending on the nature and availability of the data. Individual time series (for countries, state, province, region, or cities as described below) were then mapped to their corresponding confinement level for each day when available, or week. The percentage changes for each time-series analysed is then averaged, and that information along with the standard deviation across data was then used to estimate the parameter values for each level of confinement, where possible. These are the changes that are summarised in Figure 2 and Table 2 of the main manuscript. Where no data is available, information about the nature of the confinement was used.

The uncertainty is intended to represent approximately  $\pm 1\sigma$  around the most representative mean value for the sector. This range was estimated by combining multiple streams of data, examining the spread of the data within and among data streams, and assessing the representation of each activity data for worldwide sectoral activity. This assessment is detailed below for each sector.

### 1.4.1. Power sector

Power includes electricity, both residential and public/commercial, and heat production (44.3% of global CO<sub>2</sub> emissions). The change in power is based on three primary sources (Table S1).

**Table S1.** Data used to inform the parameters in the power sector. Each data point is the result of the analysis of a time series. See the text in this supplementary material for details.

| <b>Power</b>                                  |            |             |             |
|-----------------------------------------------|------------|-------------|-------------|
| <b>European electricity data from ENTSOE</b>  |            |             |             |
| country                                       | Level 1    | Level 2     | Level 3     |
| Austria                                       |            | -9%         | -9%         |
| Belgium                                       |            | -10%        | -18%        |
| Bulgaria                                      | -1%        | 3%          |             |
| Cyprus                                        |            |             | -18%        |
| Czechia                                       | 4%         | 1%          | -5%         |
| Germany                                       |            | -2%         | -6%         |
| Denmark                                       |            | 1%          | 1%          |
| Estonia                                       |            | -4%         | -4%         |
| Finland                                       |            | -2%         |             |
| France                                        | 1%         | -7%         | -15%        |
| Greece                                        | -2%        | -6%         | -2%         |
| Hungary                                       |            | 3%          | -7%         |
| Ireland                                       | 8%         | 6%          | -1%         |
| Italy                                         | -3%        | -5%         | -19%        |
| Latvia                                        |            | -3%         |             |
| Lithuania                                     |            | 7%          | -2%         |
| Luxembourg                                    |            | -1%         | -19%        |
| Netherlands                                   |            | -25%        |             |
| Norway                                        |            |             | 3%          |
| Poland                                        | 0%         | -3%         | -8%         |
| Portugal                                      |            | -1%         | -10%        |
| Roumania                                      | -1%        | -4%         | -7%         |
| Slovakia                                      |            | -8%         |             |
| Slovenia                                      | 1%         | -7%         |             |
| Spain                                         |            | -10%        | -14%        |
| Sweden                                        | 4%         | -4%         |             |
| Ukraine                                       |            | -11%        |             |
| United Kingdom                                | -6%        | -7%         | -16%        |
| <b>average</b>                                | <b>0%</b>  | <b>-4%</b>  | <b>-9%</b>  |
| standard deviation                            | 4%         | 6%          | 7%          |
| number of countries                           | 11         | 26          | 20          |
| <b>USA regional electricity data from EIA</b> |            |             |             |
| region                                        | Level 1    | Level 2     | Level 3     |
| California                                    | 10%        |             | -2%         |
| Carolinas                                     | 0%         |             | -8%         |
| Central                                       | -5%        | -3%         |             |
| Florida                                       | 2%         | 17%         | 1%          |
| Mid-Atlantic                                  | -5%        | -7%         | -7%         |
| Midwest                                       | -5%        | 2%          | -7%         |
| New England                                   | -7%        | -3%         | -6%         |
| Northwest                                     | -2%        | 3%          | 0%          |
| New York                                      | -6%        |             | -9%         |
| Southeast                                     | 3%         | 0%          | -10%        |
| Southwest                                     | 0%         | -1%         | -3%         |
| Tennessee                                     | 0%         | -5%         | -6%         |
| Texas                                         | 3%         | 5%          | 0%          |
| United States Lower 48                        | -2%        | 0%          | -5%         |
| <b>average</b>                                | <b>-1%</b> | <b>1%</b>   | <b>-5%</b>  |
| standard deviation                            | 4%         | 6%          | 4%          |
| number of regions                             | 13         | 10          | 12          |
| <b>India electricity demand from POSOCO</b>   |            |             |             |
|                                               | Level 1    | Level 2     | Level 3     |
| <b>average</b>                                | <b>3%</b>  | <b>-16%</b> | <b>-23%</b> |
| standard deviation                            | 4%         | 2%          | 3%          |

Electricity data for European countries from ENTSO up to 17 April 2020 (see above): We used the daily electricity load. The electricity data was adjusted for the anomaly in cooling degree days (HDD), by fitting for each country the mean load versus the mean HDD for daily winter months (October to March) during 2015-2019. The HDD adjustment led to a steeper reduction in electricity of around 2% during confinement level 3. Data for 28 European countries were analysed. These data suggest a reduction in electricity use of -9% during confinement level 3, with a non-significant reduction of -4% during confinement level 2 and no reduction during confinement level 1.

Electricity data for US from the EIA<sup>11</sup> up to 15 April 2020. We analysed daily electricity demand data and calculated the anomaly for 2020 based on the difference from the same week in 2019. The electricity data were also adjusted for HDD<sup>13</sup>. Data for 13 regions were analysed as well as aggregated data at a national level (the contiguous 48 states). The data suggest a small decrease in electricity use of -5% for confinement level 3, consistently when computed from data for individual regions and for the US as a whole.

Electricity data for India from POSOCO<sup>10</sup> up to 19 April 2020. We use data on daily energy use. The electricity data in India was not adjusted for HDD because electricity and HDD anomalies did not show a significant relationship, possibly due to the relatively low use of active heating or cooling in the country. The data was reported nationally for India and suggests a decrease in electricity use of -16% and -23% for confinement levels 2 and 3.

The three data sources are approximate indicators of changes in power, which includes heat as well as electricity generation. The differences between the European countries and US data could be accounted for by the fact that the European countries have been in confinement level 3 for longer, and there is some inertia in the changes as activities wind down and countries adjust to the new confinement. The large changes in electricity in India could reflect the larger portion of electricity use in public and commercial sectors compared to the residential sectors. The difference in electricity generation also responds to user demand, with expected increased demand in the residential sector, and decreased demand in industry and commerce.

To reflect these complexities, we adopt parameter values that average the changes in these three regions, rounded off to the nearest 5 to reflect uncertainty in the data. Likewise, the minimum and maximum values are the minimum and maximum of these three regions, rounded off to the nearest 5. The parameters used are summarised in Table S2.

**Table S2.** Parameters for the power sector.

| <i>Power</i> | Level 1    | Level 2       | Level 3         |
|--------------|------------|---------------|-----------------|
|              | 0 (0 to 0) | -5 (0 to -15) | -15 (-5 to -25) |

### 1.4.2. Industry sector

Industry (22.4% of global CO<sub>2</sub> emissions) includes production of materials (e.g. steel), manufacturing, and cement. The change in industry is based primarily on changes in China's coal consumption as reported by Myllyvirta (2020)<sup>12</sup> for six coal producers, based on commercial data from WIND (Table S3), using data up to 4 April 2020. Because China has been in and out of confinement, we were able to analyse the data for confinement level 2 before and after the confinement level 3. For the early phase of confinement level 2, there was no decrease in industry observed compared to previous years. However, the inference from the data is made more difficult from the fact that China was also celebrating New Years

at that time, and industrial production is relatively low and the data across years is highly variable. Decreases in coal consumption was -37% in level 3, and -35% and -20% when confinement decreased to levels 2 and 1, respectively.

This data is consistent with weekly report from USA steel production of the American Iron and Steel Institute <sup>14</sup>. Although only five weeks of data are available, they also show no change in production at confinement levels 1 and 2, and a change of -33% when confinement level 3 was established the two weeks ending on 11 and 19 April. Note that the decrease in steel production was smaller the first April week (-19%), probably due to the fact that the response of steel production is more related to the time lag in demand rather than to employee availability. These industrial data are also consistent with reports by the French electricity provider of -27% decrease in electricity use by the manufacturing sector<sup>15</sup>.

**Table S3.** Data used to inform the parameters in the industry sector. See the text in this supplementary material for details.

| <b>Industry</b>                                                                   |         |         |         |         |         |
|-----------------------------------------------------------------------------------|---------|---------|---------|---------|---------|
| <b>China's coal consumption reported by Myllyvirta (2020) using the WIND data</b> |         |         |         |         |         |
|                                                                                   | Level 1 | Level 2 | Level 3 | Level 2 | Level 1 |
| average                                                                           |         | 2%      | -37%    | -35%    | -20%    |
| standard deviation                                                                |         | 10%     | 5%      | 4%      | 4%      |
| number of days                                                                    | 0       | 13      | 19      | 12      | 21      |
| <b>USA steel production from the American Iron and Steel Institute</b>            |         |         |         |         |         |
|                                                                                   | Level 1 | Level 2 | Level 3 |         |         |
| average                                                                           | -1%     | 0%      | -33%    |         |         |
| number of weeks                                                                   | 2       | 1       | 2       |         |         |

We adopt parameter values that average from the China and US data sets for the confinement level 3, and use 2 standard deviation for the uncertainty, as limited data was available. For confinement level 1 and 2, we use the average of changes in China's coal consumption before and after the confinement level 3, with the high and low ranges also from the values before and after confinement level 3. The parameters are rounded off to the nearest 5 to reflect uncertainty in the data. The parameters used are as follows:

**Table S4.** Parameters for the industry sector.

| Industry | Level 1        | Level 2        | Level 3          |
|----------|----------------|----------------|------------------|
|          | -10 (0 to -20) | -15 (0 to -35) | -35 (-25 to -45) |

### 1.4.3. Surface transport sector

Surface transport (20.6% of global emissions) includes cars, light vehicles, buses and trucks, as well as shipping. The change in surface transport is based on four primary sources (Table S5).



**Table S5.** Data used to inform the parameters in the surface transport sector. See the text in this supplementary material for details.

**Surface transport**

| Mobility trends report from Apple |            |             |             |      |
|-----------------------------------|------------|-------------|-------------|------|
|                                   | Level 1    | Level 2     | Level 3     |      |
| Africa                            | 10%        | -42%        | -77%        | n=5  |
| Europe                            | 1%         | -41%        | -61%        | n=30 |
| Middle East and Asia              | -2%        | -39%        | -61%        | n=11 |
| North America                     | -16%       | -52%        | -46%        | n=3  |
| Oceania                           | 4%         | -35%        | -67%        | n=2  |
| South America                     | -20%       | -67%        | -72%        | n=3  |
| <b>average</b>                    | <b>-2%</b> | <b>-43%</b> | <b>-63%</b> |      |
| standard deviation                | 18%        | 20%         | 16%         |      |
| number of countries               | 32         | 51          | 33          |      |

| Urban congestion index from TOMTOM |             |             |             |                  |
|------------------------------------|-------------|-------------|-------------|------------------|
|                                    | Level 1     | Level 2     | Level 3     | number of cities |
| Africa                             |             |             | -34%        | n=6              |
| China                              | -21%        |             |             | n=21             |
| Europe                             |             | -34%        | -46%        | n=132            |
| Middle East and Asia               | -9%         | -43%        | -94%        | n=25             |
| North America                      |             | -58%        | -62%        | n=91             |
| Oceania                            |             |             | -27%        | n=22             |
| South America                      |             | -49%        | -40%        | n=18             |
| <b>average (all cities)</b>        | <b>-18%</b> | <b>-46%</b> | <b>-50%</b> |                  |
| standard deviation                 | 23%         | 25%         | 23%         |                  |
| number of data                     | 26          | 113         | 272         |                  |

| State traffic data for the USA from MS2 |             |             |             |  |
|-----------------------------------------|-------------|-------------|-------------|--|
| State traffic                           |             |             |             |  |
| state                                   | Level 1     | Level 2     | Level 3     |  |
| Washington                              | 1%          | -16%        | -41%        |  |
| Montana                                 | -8%         |             | -36%        |  |
| Colorado                                | -17%        |             | -45%        |  |
| Arizona                                 | -2%         | -26%        | -38%        |  |
| New Mexico                              | -8%         |             | -38%        |  |
| Texas                                   | -12%        | -37%        | -36%        |  |
| Missouri                                | -20%        | -42%        | -45%        |  |
| Louisiana                               | 3%          |             | -32%        |  |
| Illinois                                | -9%         |             | -42%        |  |
| Indiana                                 | -12%        |             | -42%        |  |
| Michigan                                | -13%        |             | -55%        |  |
| Ohio                                    | -14%        |             | -45%        |  |
| Tennessee                               | -6%         | -25%        | -33%        |  |
| Virginia                                | -26%        |             | -44%        |  |
| North Carolina                          | -18%        |             | -43%        |  |
| Florida                                 | -10%        | -33%        | -43%        |  |
| Vermont                                 | -15%        |             | -51%        |  |
| Massachusetts                           | -15%        | -49%        | -49%        |  |
| Connecticut                             | -14%        |             | -49%        |  |
| Rhode Island                            | -2%         | -31%        | -43%        |  |
| <b>average</b>                          | <b>-11%</b> | <b>-33%</b> | <b>-42%</b> |  |
| standard deviation                      | 7%          | 10%         | 6%          |  |
| number of data                          | 20          | 8           | 15          |  |

| Total traffic data from the UK Cabinet office |           |             |             |  |
|-----------------------------------------------|-----------|-------------|-------------|--|
| Traffic from all motor vehicles               |           |             |             |  |
|                                               | Level 1   | Level 2     | Level 3     |  |
| <b>average</b>                                | <b>1%</b> | <b>-20%</b> | <b>-65%</b> |  |
| standard deviation                            | 3%        | 9%          | 6%          |  |
| number of days                                | 18        | 8           | 28          |  |

Mobility trends reported by Apple. This dataset shows a relative volume of requests for directions compared to a baseline volume on January 13 2020. We use daily data up to 17 April data for 58 countries. The mobility trends include all transports, including pedestrians and cycles. These data suggest a change in mobility of -63% during confinement level 3, -43% during confinement level 2, and no change during confinement level 1 (see Table S5).

Congestion index reported by TOMTOM<sup>16</sup>. The congestion index indicates the additional time needed to go from a to b, compared to uncongested conditions. The metrics reported by TOMTOM give the changes in congestion index for 7 days compared to the average congestion in 2019. Data for 413 cities were available, and were analysed for the week ending 4 April 2020. We excluded data from the city of Pamplona which was a clear outlier showing an increase in congestion of +80% for CI=3. These data suggest decreases in congestion by -50%, -46%, and -18% for confinement levels 3, 2, and 1, respectively (see Table S5).

Traffic data for US states from MS2 corporation<sup>17</sup>. The metrics reported by MS2 give the change in daily traffic volume compared to the same day of week in 2019. It is based on traffic sensors and smart traffic signals. Data for 20 states were available, and were analysed daily up to 15 April 2020. These data suggest decreases in traffic by -42, -33%, and -11% for for confinement levels 3, 2, and 1, respectively (see Table S5).

Total traffic from the UK Cabinet Office. This dataset includes the percentage change in the total volume of traffic from all motor vehicles on UK roads, daily for 27 February to 20 April. No seasonal adjustment is mentioned in the data source. The data suggests a decrease in traffic of -65%, -28% and -10% during confinement levels 3, 2, and 1, respectively (see Table S5).

All four metrics are indicators of CO<sub>2</sub> emissions, but they may be biased in different ways due to the nature of the metric, the regional differences, and the urban/rural differences. In the UK where we have three datasets, they are very close with the TOMTOM urban data, the Apple mobility trends, and the UK Cabinet office showing decreases in road transport of -60%, -66% and -65%, respectively. For the US where we also have three datasets, the differences are much larger. The MS2 state data has the smallest change of -42% for confinement level 3, with the TOMTOM urban congestion index for US city at -62%, and the Apple mobility data in between at 54%. Given the differences in the nature of the data, it is not possible to decide if there is one or more that are most representative of CO<sub>2</sub> emissions. We adopt parameter values for surface transport which average the findings based on the Apple mobility trends, the TOMTOM urban congestion, and the US MS2 state traffic data, and use the low and high database to set the low and high ends of the parameter uncertainty. The values are rounded off to the nearest 5 to reflect the uncertainty in the data. The parameters used are as follows:

**Table S6.** Parameters for the surface transport sector.

| Surface transport | Level 1        | Level 2          | Level 3          |
|-------------------|----------------|------------------|------------------|
|                   | -10 (0 to -20) | -40 (-35 to -45) | -50 (-40 to -65) |

International container shipping is dominated by China, featuring 7 of the 10 largest cargo ports worldwide. International shipping was held up in February with the China confinement, measured as delay, but not as reduced capacity, as ships were either mostly idling in quarantine/waiting for load (17% reduced vessel calls in week 7 2020 compared to week 7 2019). Hence, 15-20% present the immediate supply-driven effects Level 2 and 3 confinement on maritime transport. Demand-driven effects are likely to dominate the longer time scales. Lines are cutting down capacity to adjust for reduced demand and disrupted

supply chains. Sea shipping is slow and many orders from a few months ago are now shipped, whereas the full impact of COVID-19 on shipping will be only visible by end of the year, also reflecting potentially reduced demand for products. Sea Intelligence estimates 10-38% reduction in volume traded in 2020. Here we adopt the projections of the World Trade Organization, at similar magnitude, of an expected fall of between 13% and 32% in 2020, and adopt a decrease of -20% (-10 to -30%) in shipping, regardless of the confinement level. The results for shipping are reported in the surface transport, although they are calculated separately.

#### 1.4.4. Public sector

*The public sector* (4.2% of global CO<sub>2</sub> emissions) includes commercial and public buildings, including offices, schools, hospitals and government buildings. Aggregated data were not available that could represent this sector specifically. We therefore adopt parameter values based on the changes observed in other sectors, with our own assessment of the nature of the confinement. For the upper limit, we base the change in the public sector on changes in surface transport, assuming it is proportional to the change in the workforce. For the lower limit, we base the changes in the public sector on changes in electricity, assuming a range of buildings remain open and operational (e.g. hospitals, government buildings) in spite of the confinement. The central value is interpolated between the two.

**Table S7.** Parameters for the public sector.

| Public sector | Level 1       | Level 2         | Level 3          |
|---------------|---------------|-----------------|------------------|
|               | -5 (0 to -10) | -23 (-5 to -40) | -33 (-15 to -50) |

#### 1.4.5. Residential sector

*The residential sector* (5.6% of global CO<sub>2</sub> emissions) represents mostly residential buildings.

**Table S8.** Data used to inform the parameters in the residential sector. See the text in this supplementary material for details.

| <i>Residential</i>                     |         |         |         |
|----------------------------------------|---------|---------|---------|
| UK smart meter data from octopusenergy |         |         |         |
|                                        | Level 1 | Level 2 | Level 3 |
| average                                |         | 0%      | 4%      |
| standard deviation                     |         | 3%      | 4%      |
| number of days                         | 0       | 7       | 22      |

Here we use reports of residential electricity use monitored with UK smart meters from octopusenergy<sup>18</sup>, representing 120,000 users across the UK. Data are available daily from 9 March to 13 April, and are provided already adjusted for temperature variations<sup>18</sup>. The data shows no significant changes in electricity use during confinement levels 1 and 2, and a small increase of 4% during confinement level 3. Although users who do not normally stay home have tended to use substantially more electricity than they would otherwise (around 20% according to OCTOPUS who provided the data), only a fraction of the users were in that position. Taken as a whole, the increase is much smaller. This is consistent with report of the French electricity provider of a small ‘overconsumption’<sup>15</sup>. We therefore use the UK smart meter data to allocate the parameters for changes in the residential sector at

confinement level 3. We assume zero changes at confinement level 1 and average between the two for confinement level 2.

**Table S9.** Parameters for the residential sector.

| Residential | Level 1    | Level 2     | Level 3     |
|-------------|------------|-------------|-------------|
|             | 0 (0 to 0) | 0 (-5 to 5) | 5 (0 to 10) |

#### 1.4.6. Aviation sector

*Aviation* (2.8% of global CO<sub>2</sub> emissions, with radiative forcing index of 2<sup>19</sup>) consists of both domestic and international flights. The change in aircraft emissions is estimated from weekly comparisons of the number of aircrafts departing from each country compared to the corresponding week in 2019, as reported by the OAG corporation<sup>20</sup>. We use data up to the week ending on 20 April 2020. For confinement levels 2 & 3, there was a big difference between the first week of confinement, where the changes were relatively small, and subsequent weeks. This was likely caused by inertia in the sector, and the repatriation of citizens as confinement started which kept airlines open. We therefore removed the first week of data during confinement levels 2 & 3 for each country to get a better representation of the changes in aviation. We also set the lower end of level 1 to zero because the variability of the data did not suggest systematic increase in aviation at that level that could be inferred from the standard deviation alone. The parameter values are taken to be the average across countries with  $\pm$  one standard deviation as the range, again rounded to the nearest 5.

**Table S10.** Data used to inform the parameters in the aviation sector. See the text in this supplementary material for details.

| <i>Aviation</i>                                               |         |         |         |
|---------------------------------------------------------------|---------|---------|---------|
| Global Scheduled Flights Change from Aircraft on Ground (AOG) |         |         |         |
|                                                               | Level 1 | Level 2 | Level 3 |
| Italy                                                         | -4%     | -61%    | -85%    |
| Germany                                                       |         | -94%    | -91%    |
| Spain                                                         | -95%    | -94%    | -85%    |
| Hong Kong                                                     |         |         |         |
| UAE                                                           | -67%    | -86%    |         |
| France                                                        | -2%     |         | -79%    |
| UK                                                            | -5%     |         | -88%    |
| India                                                         | 6%      |         | -61%    |
| Australia                                                     | -3%     | -84%    | -75%    |
| Sweden                                                        | -41%    | -84%    |         |
| South Korea                                                   | -9%     | -54%    |         |
| China                                                         | 2%      | -42%    | -67%    |
| Japan                                                         | -9%     |         | -42%    |
| USA                                                           | 0%      |         | -55%    |
| average                                                       | -19%    | -75%    | -73%    |
| standard deviation                                            | 30%     | 18%     | 15%     |
| number of countries                                           | 12      | 8       | 10      |

**Table S11.** Parameters for the aviation sector.

| Aviation | Level 1        | Level 2          | Level 3          |
|----------|----------------|------------------|------------------|
|          | -20 (0 to -50) | -75 (-55 to -95) | -75 (-60 to -90) |

## 2. Additional tables of results

**Table S12.** Change in daily fossil CO<sub>2</sub> emission on 7 April 2020 compared to mean daily 2019 levels. The change in emissions on 7 April was the largest estimated daily change during 1 January to 30 April 2020. The right-hand column shows the contribution of each sector to the total absolute change in CO<sub>2</sub> emissions.

|                   | Absolute change           | Change relative to mean | Contribution to global   |
|-------------------|---------------------------|-------------------------|--------------------------|
|                   | MtCO <sub>2</sub> per day | 2019 sector level       | CO <sub>2</sub> decrease |
|                   |                           | percent                 | percent                  |
| <b>Total</b>      | -17 (-11 to -25)          | -17% (-11% to -25%)     |                          |
| Power             | -3.3 (-1.0 to -6.0)       | -7.4% (-2.2% to -14%)   | 19%                      |
| Industry          | -4.3 (-2.3 to -6.5)       | -19% (-10.1% to -29%)   | 25%                      |
| Surface Transport | -7.5 (-5.9 to -9.6)       | -36% (-28% to -46%)     | 43%                      |
| Public            | -0.9 (-0.3 to -1.4)       | -21% (-8.1% to -33%)    | 5.1%                     |
| Residential       | 0.2 (-0.1 to 0.4)         | 2.8% (-1.0% to 6.7%)    | -0.9%                    |
| Aviation          | -1.7 (-1.3 to -2.2)       | -60% (-44% to -76%)     | 9.7%                     |

**Table S13.** Change in fossil CO<sub>2</sub> emission during 1 January to 30 April 2020 (4 months), with the percent change relative to annual 2019 emissions (12 months), for the Globe, US, China, India, EU27+UK.

|         | MtCO <sub>2</sub>     | percent from 2019 level |
|---------|-----------------------|-------------------------|
| Global  | -1048 (-543 to -1638) | -2.9% (-1.5% to -4.5%)  |
| China   | -242 (-108 to -394)   | -2.6% (-1.2% to -4.3%)  |
| US      | -207 (-112 to -314)   | -3.9% (-2.1% to -6.0%)  |
| EU27+UK | -123 (-78 to -177)    | -3.3% (-2.1% to -4.7%)  |
| India   | -98 (-47 to -154)     | -3.6% (-1.7% to -5.6%)  |

**Table S14.** Change in fossil CO<sub>2</sub> emission during 1 January to 31 December 2020 compared to 2019 levels, for the Globe, US, China, India, EU27+UK. Changes are for the three sensitivity tests described in the text.

|                   | <b>MtCO<sub>2</sub></b> | <b>percent from 2019 level</b> |
|-------------------|-------------------------|--------------------------------|
| <b>Scenario 1</b> |                         |                                |
| Global            | -1524 (-795 to -2403)   | -4.2% (-2.2% to -6.6%)         |
| China             | -243 (-108 to -396)     | -2.6% (-1.2% to -4.3%)         |
| US                | -355 (-209 to -529)     | -6.7% (-4.0% to -10.0%)        |
| EU27+UK           | -189 (-114 to -280)     | -5.1% (-3.0% to -7.5%)         |
| India             | -143 (-65 to -238)      | -5.2% (-2.4% to -8.7%)         |
| <b>Scenario 2</b> |                         |                                |
| Global            | -1923 (-965 to -3083)   | -5.3% (-2.6% to -8.4%)         |
| China             | -288 (-108 to -488)     | -3.1% (-1.2% to -5.3%)         |
| US                | -471 (-283 to -700)     | -8.9% (-5.4% to -13.3%)        |
| EU27+UK           | -234 (-135 to -350)     | -6.2% (-3.6% to -9.4%)         |
| India             | -185 (-81 to -317)      | -6.8% (-3.0% to -11.6%)        |
| <b>Scenario 3</b> |                         |                                |
| Global            | -2729 (-986 to -4717)   | -7.5% (-2.7% to -12.9%)        |
| China             | -522 (-108 to -965)     | -5.6% (-1.2% to -10.4%)        |
| US                | -604 (-283 to -973)     | -11.5% (-5.4% to -18.5%)       |
| EU27+UK           | -316 (-140 to -517)     | -8.5% (-3.8% to -13.8%)        |
| India             | -238 (-81 to -425)      | -8.7% (-3.0% to -15.6%)        |

### 3. Comparison to Earth Observations

Insights from Earth observations of co-emitted species offer insights into the feasibility of the calculated changes to CO<sub>2</sub> emission. NO<sub>2</sub> is a useful indicator of rapid changes in fossil fuel combustion at regional and local scales<sup>21-23</sup> because around two-thirds of global surface NO<sub>2</sub> emissions derive from fossil fuel combustion<sup>21</sup> and its residence time is less than one day. We assessed changes in the NO<sub>2</sub> atmospheric column density using data from the NASA OMI/Aura NO<sub>2</sub> Cloud-Screened Total and Tropospheric Column L3 Global Gridded 0.25 degree x 0.25 degree V3 (OMNO2d 003)<sup>24</sup>. We used NO<sub>2</sub> total column density from pixel level data passing a good quality filter and with cloud cover <30% (product variable name: ColumnAmountNO2CloudScreened). We averaged the daily total column NO<sub>2</sub> from OMNO2d 003 at the global scale and within large regions for the period 1<sup>st</sup> January 2005-2<sup>nd</sup> April 2020. Daily anomalies were calculated for 2020 relative to the 2015-2019 mean. The Aura satellite, on which the OMI sensor is deployed, has a sun-synchronous orbit and thus processes through one complete revolution each year. This enables daily retrievals of vertical atmospheric column NO<sub>2</sub> to be compared across years.

Daily anomalies in the global mean NO<sub>2</sub> atmospheric column density averaged -5% relative to the 2015-2019 mean since the first Chinese provinces implemented CI2 restrictions on 22<sup>nd</sup> January 2020, -6% since Italy implemented CI2 restrictions one month later, and -7% in the final week of March 2020 (Fig. 4). In the month prior to the first implementation of CI2 in China, daily anomalies in global mean NO<sub>2</sub> atmospheric column density were typical for the time of year, averaging -2.5%. Although these observations do not provide direct quantification of reductions in global or regional NO<sub>2</sub> emissions fluxes, they do nonetheless indicate a substantial deficit in NO<sub>2</sub> emission relative to NO<sub>2</sub> removal in the period of the COVID-19 outbreak versus previous years.

There was strong congruence between the observed anomalies in atmospheric column NO<sub>2</sub> and the estimated anomalies in CO<sub>2</sub> emission in the period January-March 2020, according to a significant zero-intercept (CO<sub>2</sub> anomaly = 0.989 × NO<sub>2</sub> anomaly; Adjusted R<sup>2</sup> = 0.81, p < 1 × 10<sup>-15</sup>; zero-intercept model fitted after verifying that the intercept was non-significant).

**Figure S1: (Left panel)** Global mean vertical column density of NO<sub>2</sub> (molecules cm<sup>-2</sup>) for all years 2005-2019 (light blue lines) and for the period 1<sup>st</sup> January-15<sup>th</sup> April 2020 (red line), based on the NASA OMI/Aura NO<sub>2</sub> Cloud-Screened Total and Tropospheric Column L3 Global Gridded 0.25 degree x 0.25 degree V3 (OMNO2d 003)<sup>24</sup>. The dark blue line marks the inter-annual average daily value for 2005-2019. **(Right panel)** Equivalent daily anomalies relative to the 2015-2019 mean.

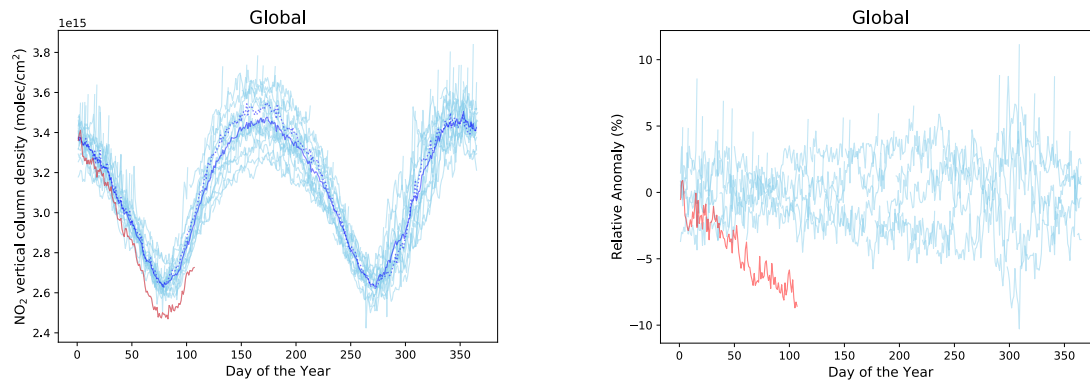

**Figure S2:** Comparison of the relative anomalies in regional mean vertical column density of NO<sub>2</sub> anomalies (see figure S1) and estimated anomalies in total CO<sub>2</sub> emission in the period 1<sup>st</sup> January-15<sup>th</sup> April 2020. The panels show (left panel) a times series of the anomalies to April 2nd 2020 and (right panel) a scatter plot of the daily anomalies for each variable. The black line in the right panel shows the simple linear regression equation fitted to the variables (CO<sub>2</sub> anomaly = 1.59 NO<sub>2</sub>; Adjusted R<sup>2</sup> = 0.88, p < 1 × 10<sup>-15</sup>; zero-intercept model fitted after verifying that the intercept was non-significant).

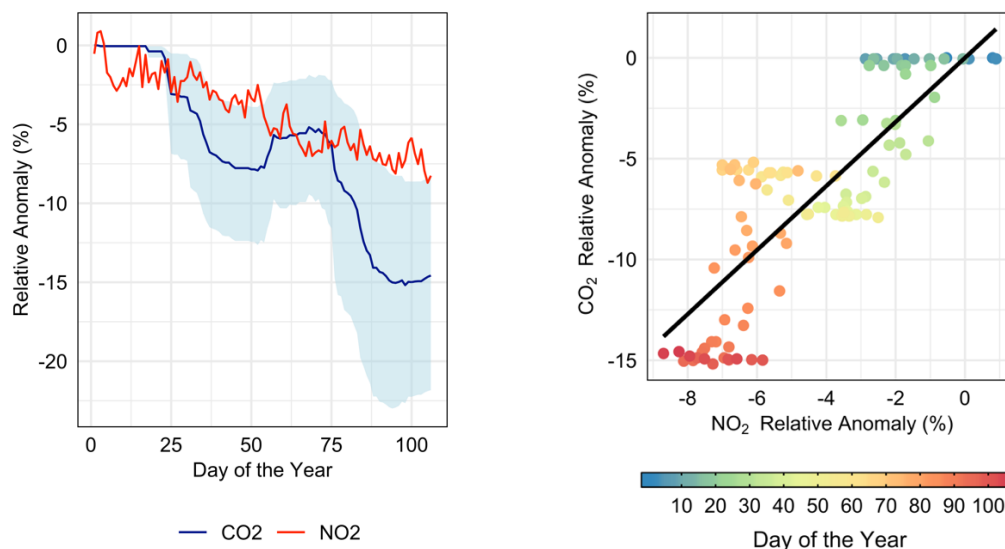

## 4. Scenario Figures

**Figure S3:** Global daily fossil CO<sub>2</sub> emissions in MtCO<sub>2</sub> d<sup>-1</sup>. **(Left panel)** Annual mean daily emissions in the period 2000-2019 updated from the Global Carbon Project<sup>1,3</sup>. The grey uncertainty range represents  $\pm 5\%$  ( $\pm 1\sigma$ ) uncertainty in global fossil CO<sub>2</sub> emissions. **(Right panel)** Change in daily CO<sub>2</sub> emissions in the year 2020 relative to annual mean daily emissions in the year 2019. The solid red line represents our estimates based on the confinement index (CI) and corresponding change in activity for each CI level (Figure 2). The red uncertainty range accounts for uncertainty in the changes in activity data (Table 2). The broken red lines represent projected changes in emissions in the three future scenarios described in the text: sensitivity test 3 (high end) (dotted); sensitivity test 2 (middle) (dashed line); sensitivity test 1 (low end) (dot-dashed line). Daily emissions in 2020 are smoothed with a 7-day box filter to account for the transition between confinement levels.

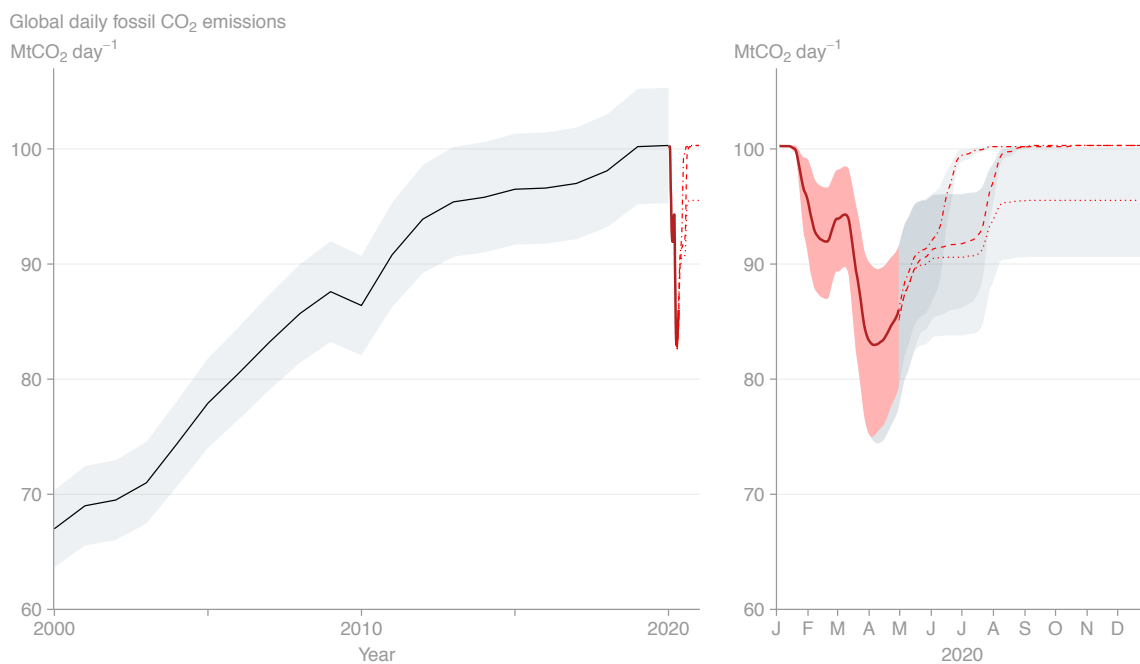



## 5. Country, provinces and state details

**Table S15.** Date when confinement index levels 1-3 were reached and relaxed by country, China provinces and US states (as of 19<sup>th</sup> April 2020). Future dates for policy relaxation are as announced as of 30<sup>th</sup> April 2020, sometimes informally and conditional to the evolving situation, while § symbol represents an assumed date for relaxation of policy as actual date not yet announced. Blank cells represent CI level skipped or policy end date not yet announced.

| Country name         | Confinement Index Level |        |        |        |          |          | 0      |
|----------------------|-------------------------|--------|--------|--------|----------|----------|--------|
|                      | 0                       | 1      | 2      | 3      | 2        | 1        |        |
| Algeria              | 01-Jan                  |        | 17-Mar | 04-Apr | 24-Apr   |          | 31-Dec |
| Argentina            | 01-Jan                  |        | 16-Mar | 20-Mar | 26-Apr   | 10-May   | 31-Dec |
| Australia            | 01-Jan                  | 01-Feb | 22-Mar | 26-Mar | 27-Apr   |          | 31-Dec |
| Austria              | 01-Jan                  |        | 15-Mar | 16-Mar | 14-Apr   | 15-May   | 31-Dec |
| Bangladesh           | 01-Jan                  | 01-Feb | 17-Mar | 26-Mar | 27-Apr   |          | 31-Dec |
| Belgium              | 01-Jan                  |        | 12-Mar | 18-Mar | 04-May   | 18-May   | 31-Dec |
| Brazil               | 01-Jan                  | 14-Mar | 17-Mar |        |          | 07-Apr   | 31-Dec |
| Bulgaria             | 01-Jan                  | 08-Mar | 13-Mar |        |          | 07-Apr   | 31-Dec |
| Canada               | 01-Jan                  | 16-Mar | 24-Mar |        |          | 04-May § | 31-Dec |
| Chile                | 01-Jan                  |        | 22-Mar |        |          | 23-Apr   | 31-Dec |
| China                | Analysed separately     |        |        |        |          |          |        |
| Colombia             | 01-Jan                  | 12-Mar | 16-Mar | 25-Mar | 27-Apr   | 11-May   | 31-Dec |
| Croatia              | 01-Jan                  | 24-Feb | 16-Mar | 21-Mar | 27-Apr   | 11-May   | 31-Dec |
| Cyprus               | 01-Jan                  |        | 13-Mar | 24-Mar | 30-Apr   |          | 31-Dec |
| Czech Republic       | 01-Jan                  | 03-Mar | 10-Mar | 16-Mar | 20-Apr   | 08-Jun   | 31-Dec |
| Denmark              | 01-Jan                  |        | 11-Mar | 16-Mar | 15-Apr   | 10-May   | 31-Dec |
| Egypt                | 01-Jan                  | 14-Feb | 19-Mar |        |          | 23-Apr   | 31-Dec |
| Estonia              | 01-Jan                  |        | 16-Mar |        |          | 15-May   | 31-Dec |
| Finland              | 01-Jan                  |        | 16-Mar |        | 19-Apr   | 31-May   | 31-Dec |
| France               | 01-Jan                  | 29-Feb | 12-Mar | 17-Mar | 11-May   |          | 31-Dec |
| Germany              | 01-Jan                  |        | 16-Mar | 23-Mar | 20-Apr   | 04-May   | 31-Dec |
| Greece               | 01-Jan                  | 09-Mar | 13-Mar | 23-Mar | 10-May   |          | 31-Dec |
| Hungary              | 01-Jan                  |        | 11-Mar | 28-Mar | 03-May § |          | 31-Dec |
| India                | 01-Jan                  | 18-Jan | 16-Mar | 25-Mar | 25-Apr   | 03-May   | 31-Dec |
| Indonesia            | 01-Jan                  | 05-Feb | 16-Mar |        | 22-May   | 25-Jul   | 31-Dec |
| Iran                 | 01-Jan                  |        | 28-Feb |        |          | 18-Apr   | 31-Dec |
| Iraq                 | 01-Jan                  |        | 27-Feb | 22-Mar | 23-Apr   |          | 31-Dec |
| Ireland              | 01-Jan                  | 29-Feb | 12-Mar | 28-Mar | 05-May   |          | 31-Dec |
| Israel               | 01-Jan                  |        | 10-Mar | 19-Mar | 19-Apr § | 03-May § | 31-Dec |
| Italy                | 01-Jan                  | 30-Jan | 23-Feb | 09-Mar | 14-Apr   | 01-Jun   | 31-Dec |
| Japan                | 01-Jan                  | 28-Jan | 28-Mar | 07-Apr | 06-May   |          | 31-Dec |
| Kazakhstan           | 01-Jan                  | 26-Jan | 16-Mar |        |          | 28-Apr   | 31-Dec |
| South Korea          | 01-Jan                  | 04-Feb | 21-Feb |        |          | 20-Apr § | 31-Dec |
| Kuwait               | 01-Jan                  |        | 12-Mar |        |          | 25-Apr   | 31-Dec |
| Latvia               | 01-Jan                  |        | 13-Mar |        |          | 12-May   | 31-Dec |
| Lithuania            | 01-Jan                  |        | 12-Mar | 16-Mar | 27-Apr   | 11-May   | 31-Dec |
| Luxembourg           | 01-Jan                  |        | 13-Mar | 15-Mar | 20-Apr § | 04-May   | 31-Dec |
| Malaysia             | 01-Jan                  | 28-Feb | 14-Mar | 18-Mar | 12-May   |          | 31-Dec |
| Malta                | 01-Jan                  | 24-Feb | 12-Mar | 22-Mar | 11-May § |          | 31-Dec |
| Mexico               | 01-Jan                  |        | 24-Mar |        |          | 30-May   | 31-Dec |
| Morocco              | 01-Jan                  |        | 14-Mar | 19-Mar | 20-May   |          | 31-Dec |
| Netherlands          | 01-Jan                  |        | 16-Mar |        |          | 20-May   | 31-Dec |
| New Zealand          | 01-Jan                  | 02-Feb | 20-Mar | 26-Mar | 27-Apr   |          | 31-Dec |
| Nigeria              | 01-Jan                  |        | 30-Mar |        |          | 04-May   | 31-Dec |
| Norway               | 01-Jan                  |        |        | 12-Mar | 20-Apr   | 15-Jun   | 31-Dec |
| Oman                 | 01-Jan                  |        | 17-Mar |        |          | 08-May § | 31-Dec |
| Pakistan             | 01-Jan                  |        | 13-Mar | 24-Mar | 14-Apr   | 09-May   | 31-Dec |
| Philippines          | 01-Jan                  | 02-Feb | 15-Mar |        |          | 15-May   | 31-Dec |
| Poland               | 01-Jan                  | 25-Jan | 12-Mar | 25-Mar | 19-Apr   | 03-May   | 31-Dec |
| Portugal             | 01-Jan                  |        | 12-Mar | 19-Mar | 03-May   |          | 31-Dec |
| Qatar                | 01-Jan                  | 09-Mar | 17-Mar |        |          | 25-Apr § | 31-Dec |
| Romania              | 01-Jan                  | 25-Feb | 11-Mar | 24-Mar | 15-May   |          | 31-Dec |
| Russian Federation   | 01-Jan                  | 03-Feb | 19-Mar | 28-Mar | 12-May   |          | 31-Dec |
| Saudi Arabia         | 01-Jan                  | 27-Feb | 14-Mar | 06-Apr | 29-Apr   | 13-May § | 31-Dec |
| Slovakia             | 01-Jan                  |        | 13-Mar |        | 22-Apr   |          | 31-Dec |
| Slovenia             | 01-Jan                  | 09-Mar | 16-Mar |        | 20-Apr   | 04-May   | 31-Dec |
| South Africa         | 01-Jan                  | 14-Mar | 15-Mar | 26-Mar | 01-May § |          | 31-Dec |
| Spain                | 01-Jan                  |        | 10-Mar | 14-Mar | 13-Apr   |          | 31-Dec |
| Sweden               | 01-Jan                  | 12-Mar | 04-Apr |        |          | 11-May § | 31-Dec |
| Thailand             | 01-Jan                  | 03-Jan | 17-Mar |        |          | 31-May   | 31-Dec |
| Turkey               | 01-Jan                  | 24-Jan | 16-Mar |        |          | 20-May   | 31-Dec |
| Turkmenistan         | 01-Jan                  | 20-Mar |        |        |          | 30-Apr § | 31-Dec |
| Ukraine              | 01-Jan                  |        | 17-Mar |        |          | 12-May   | 31-Dec |
| United Arab Emirates | 01-Jan                  | 17-Mar | 26-Mar |        |          | 25-Apr   | 31-Dec |
| United Kingdom       | 01-Jan                  | 10-Feb | 16-Mar | 24-Mar | 08-May   |          | 31-Dec |
| USA                  | Analysed separately     |        |        |        |          |          |        |
| Uzbekistan           | 01-Jan                  | 15-Mar | 20-Mar | 27-Mar | 12-May § |          | 31-Dec |
| Venezuela            | 01-Jan                  | 02-Feb | 12-Mar | 17-Mar | 12-May   |          | 31-Dec |
| Vietnam              | 01-Jan                  | 01-Feb | 22-Mar | 01-Apr | 15-Apr   | 22-Apr   | 31-Dec |

Table S15 (continued).

| Country name         | Confinement Index Level |        |        |        |          |        |        |
|----------------------|-------------------------|--------|--------|--------|----------|--------|--------|
|                      | 0                       | 1      | 2      | 3      | 2        | 1      | 0      |
| Beijing              | 01-Jan                  |        | 24-Jan | 09-Feb |          | 29-Feb | 31-Dec |
| Tianjin              | 01-Jan                  |        | 24-Jan | 06-Feb |          | 29-Feb | 31-Dec |
| Hebei                | 01-Jan                  |        | 24-Jan | 06-Feb |          | 25-Mar | 31-Dec |
| Shanxi               | 01-Jan                  |        | 25-Jan | 09-Feb |          | 24-Feb | 31-Dec |
| Inner Mongolia       | 01-Jan                  |        | 25-Jan | 13-Feb |          | 26-Feb | 31-Dec |
| Liaoning             | 01-Jan                  |        | 25-Jan | 06-Feb |          | 22-Feb | 31-Dec |
| Jilin                | 01-Jan                  |        | 25-Jan | 06-Feb |          | 26-Feb | 31-Dec |
| Heilongjiang         | 01-Jan                  |        | 25-Jan | 04-Feb |          | 05-Mar | 31-Dec |
| Shanghai             | 01-Jan                  |        | 24-Jan | 10-Feb |          | 23-Mar | 31-Dec |
| Jiangsu              | 01-Jan                  |        | 25-Jan | 04-Feb |          | 25-Feb | 31-Dec |
| Zhejiang             | 01-Jan                  |        | 23-Jan | 04-Feb |          | 02-Mar | 31-Dec |
| C Anhui              | 01-Jan                  |        | 24-Jan | 07-Feb |          | 25-Feb | 31-Dec |
| H Fujian             | 01-Jan                  |        | 24-Jan | 04-Feb |          | 26-Feb | 31-Dec |
| I Jiangxi            | 01-Jan                  |        | 24-Jan | 04-Feb |          | 12-Mar | 31-Dec |
| N Shandong           | 01-Jan                  |        | 24-Jan | 05-Feb |          | 08-Mar | 31-Dec |
| A Henan              | 01-Jan                  |        | 25-Jan | 03-Feb |          | 19-Mar | 31-Dec |
| Hubei                | 01-Jan                  |        | 23-Jan | 03-Feb | 12-Mar   | 28-Mar | 31-Dec |
| Hunan                | 01-Jan                  |        | 23-Jan | 14-Feb |          | 11-Mar | 31-Dec |
| Guangdong            | 01-Jan                  |        | 23-Jan | 04-Feb |          | 24-Feb | 31-Dec |
| Guangxi              | 01-Jan                  |        | 24-Jan | 05-Feb |          | 26-Feb | 31-Dec |
| Hainan               | 01-Jan                  |        | 25-Jan | 04-Feb |          | 26-Feb | 31-Dec |
| Chongqing            | 01-Jan                  |        | 24-Jan | 08-Feb |          | 11-Mar | 31-Dec |
| Sichuan              | 01-Jan                  |        | 24-Jan | 05-Feb |          | 26-Feb | 31-Dec |
| Guizhou              | 01-Jan                  |        | 24-Jan | 02-Feb |          | 24-Feb | 31-Dec |
| Yunnan               | 01-Jan                  |        | 24-Jan | 11-Feb |          | 24-Feb | 31-Dec |
| Shaanxi              | 01-Jan                  |        | 25-Jan | 19-Feb |          | 28-Feb | 31-Dec |
| Gansu                | 01-Jan                  |        | 25-Jan | 08-Feb |          | 21-Feb | 31-Dec |
| Qinghai              | 01-Jan                  |        | 25-Jan |        |          | 26-Feb | 31-Dec |
| Ningxia              | 01-Jan                  |        | 25-Jan | 10-Feb |          | 28-Feb | 31-Dec |
| Xinjiang             | 01-Jan                  |        | 25-Jan |        |          | 26-Feb | 31-Dec |
| Alabama              | 01-Jan                  | 31-Jan | 16-Mar | 04-Apr | 30-Apr   | 15-May | 31-Dec |
| Alaska               | 01-Jan                  | 31-Jan | 22-Mar | 28-Mar | 24-Apr   |        | 31-Dec |
| Arizona              | 01-Jan                  | 31-Jan | 16-Mar | 31-Mar | 30-Apr   |        | 31-Dec |
| Arkansas             | 01-Jan                  | 31-Jan | 19-Mar |        |          | 04-May | 31-Dec |
| California           | 01-Jan                  | 31-Jan |        | 19-Mar | 14-May   |        | 31-Dec |
| Colorado             | 01-Jan                  | 31-Jan |        | 26-Mar | 27-Apr   |        | 31-Dec |
| Connecticut          | 01-Jan                  | 31-Jan |        | 23-Mar | 20-May   |        | 31-Dec |
| Delaware             | 01-Jan                  | 31-Jan |        | 24-Mar | 15-May   |        | 31-Dec |
| District of Columbia | 01-Jan                  | 31-Jan |        | 01-Apr | 15-May   |        | 31-Dec |
| Florida              | 01-Jan                  | 31-Jan | 24-Mar | 03-Apr | 30-Apr   |        | 31-Dec |
| Georgia              | 01-Jan                  | 31-Jan | 25-Mar | 03-Apr | 24-Apr   | 13-May | 31-Dec |
| Hawaii               | 01-Jan                  | 31-Jan |        | 25-Mar | 31-May   |        | 31-Dec |
| Idaho                | 01-Jan                  | 31-Jan |        | 25-Mar | 30-Apr   |        | 31-Dec |
| Illinois             | 01-Jan                  | 31-Jan |        | 21-Mar | 30-May   |        | 31-Dec |
| Indiana              | 01-Jan                  | 31-Jan |        | 25-Mar | 02-May   |        | 31-Dec |
| Iowa                 | 01-Jan                  | 31-Jan | 17-Mar |        |          | 30-Apr | 31-Dec |
| Kansas               | 01-Jan                  | 31-Jan | 24-Mar | 30-Mar | 03-May   |        | 31-Dec |
| Kentucky             | 01-Jan                  | 31-Jan |        | 26-Mar | 11-May   |        | 31-Dec |
| Louisiana            | 01-Jan                  | 31-Jan |        | 23-Mar | 15-May   |        | 31-Dec |
| Maine                | 01-Jan                  | 31-Jan | 25-Mar | 02-Apr | 15-May   |        | 31-Dec |
| Maryland             | 01-Jan                  | 31-Jan |        | 30-Mar | 15-May § |        | 31-Dec |
| Massachusetts        | 01-Jan                  | 31-Jan | 24-Mar | 31-Mar | 04-May   |        | 31-Dec |
| Michigan             | 01-Jan                  | 31-Jan |        | 24-Mar | 15-May   |        | 31-Dec |
| Minnesota            | 01-Jan                  | 31-Jan |        | 27-Mar | 27-Apr   |        | 31-Dec |
| Mississippi          | 01-Jan                  | 31-Jan | 22-Mar | 03-Apr | 11-May   |        | 31-Dec |
| U Missouri           | 01-Jan                  | 31-Jan | 23-Mar | 06-Apr | 03-May   |        | 31-Dec |
| S Montana            | 01-Jan                  | 31-Jan |        | 28-Mar | 26-Apr   | 07-May | 31-Dec |
| A Nebraska           | 01-Jan                  | 31-Jan | 20-Mar | 09-Apr | 04-May   | 31-May | 31-Dec |
| Nevada               | 01-Jan                  | 31-Jan | 20-Mar | 01-Apr | 15-May   |        | 31-Dec |
| New Hampshire        | 01-Jan                  | 31-Jan |        | 27-Mar | 15-May   |        | 31-Dec |
| New Jersey           | 01-Jan                  | 31-Jan |        | 21-Mar | 15-May § |        | 31-Dec |
| New Mexico           | 01-Jan                  | 31-Jan |        | 24-Mar | 15-May   |        | 31-Dec |
| New York             | 01-Jan                  | 31-Jan |        | 22-Mar | 15-May   |        | 31-Dec |
| North Carolina       | 01-Jan                  | 31-Jan |        | 30-Mar | 08-May   |        | 31-Dec |
| North Dakota         | 01-Jan                  | 31-Jan | 20-Mar |        |          | 01-May | 31-Dec |
| Ohio                 | 01-Jan                  | 31-Jan |        | 24-Mar | 04-May   |        | 31-Dec |
| Oklahoma             | 01-Jan                  | 31-Jan | 26-Mar |        | 24-Apr   |        | 31-Dec |
| Oregon               | 01-Jan                  | 31-Jan |        | 23-Mar | 01-May   |        | 31-Dec |
| Pennsylvania         | 01-Jan                  | 31-Jan | 23-Mar | 01-Apr | 01-May   |        | 31-Dec |
| Rhode Island         | 01-Jan                  | 31-Jan | 16-Mar | 28-Mar | 08-May   |        | 31-Dec |
| South Carolina       | 01-Jan                  | 31-Jan | 26-Mar |        |          | 21-Apr | 31-Dec |
| South Dakota         | 01-Jan                  | 31-Jan | 23-Mar |        |          | 02-May | 31-Dec |
| Tennessee            | 01-Jan                  | 31-Jan | 23-Mar | 31-Mar | 29-Apr   |        | 31-Dec |
| Texas                | 01-Jan                  | 31-Jan | 27-Mar | 02-Apr | 01-May   |        | 31-Dec |
| Utah                 | 01-Jan                  | 31-Jan | 27-Mar |        |          | 01-May | 31-Dec |
| Vermont              | 01-Jan                  | 31-Jan |        | 25-Mar | 15-May   |        | 31-Dec |
| Virginia             | 01-Jan                  | 31-Jan |        | 30-Mar | 10-Jun   |        | 31-Dec |
| Washington           | 01-Jan                  | 31-Jan | 12-Mar | 23-Mar | 05-May   |        | 31-Dec |
| West Virginia        | 01-Jan                  | 31-Jan |        | 24-Mar | 04-May   |        | 31-Dec |
| Wisconsin            | 01-Jan                  | 31-Jan |        | 24-Mar | 26-May   |        | 31-Dec |
| Wyoming              | 01-Jan                  | 31-Jan | 28-Mar |        |          | 15-May | 31-Dec |

**Table S16.** Sector allocation by country, US states and China provinces, total CO<sub>2</sub> emissions for the last year available, and population. Sector allocations are from the IEA<sup>25</sup> for world countries, EIA<sup>13</sup> for the US, and national statistics<sup>26</sup> for Chinese provinces. CO<sub>2</sub> emissions are the mean daily emissions for the latest available year (2017 to 2019) updated from the Global Carbon Project for world countries (GCP; 2019)<sup>1</sup>, EIA<sup>13</sup> for the US, and national statistics<sup>26</sup> for Chinese provinces.

|                      | Power   | Industry | Transport | Public  | Residential | Aviation | Population   | CO <sub>2</sub> emissions    | Reduced CO <sub>2</sub> emissions |
|----------------------|---------|----------|-----------|---------|-------------|----------|--------------|------------------------------|-----------------------------------|
| Country name         | percent | percent  | percent   | percent | percent     | percent  | (000s; 2018) | (MtCO <sub>2</sub> /d; 2018) | percent                           |
| Algeria              | 33.9%   | 14.9%    | 31.9%     | 2.8%    | 15.4%       | 1.1%     | 42228        | 0.43                         | -27.1%                            |
| Argentina            | 36.1%   | 17.4%    | 24.5%     | 7.9%    | 11.5%       | 2.5%     | 44495        | 0.55                         | -27.3%                            |
| Australia            | 56.2%   | 10.2%    | 22.4%     | 3.2%    | 2.3%        | 5.6%     | 24992        | 1.20                         | -28.3%                            |
| Austria              | 29.8%   | 18.9%    | 35.4%     | 2.9%    | 9.8%        | 3.3%     | 8847         | 0.20                         | -31.7%                            |
| Bangladesh           | 45.9%   | 22.4%    | 14.0%     | 4.8%    | 11.3%       | 1.5%     | 161356       | 0.24                         | -23.7%                            |
| Belgium              | 18.2%   | 17.1%    | 40.6%     | 7.1%    | 13.0%       | 3.9%     | 11422        | 0.36                         | -27.7%                            |
| Brazil               | 21.3%   | 23.6%    | 43.9%     | 3.7%    | 3.9%        | 3.6%     | 209469       | 1.30                         | -25.2%                            |
| Bulgaria             | 61.3%   | 12.4%    | 20.9%     | 1.7%    | 1.9%        | 1.7%     | 7024         | 0.12                         | -14.8%                            |
| Canada               | 38.5%   | 13.2%    | 28.1%     | 10.1%   | 6.9%        | 3.3%     | 37059        | 1.57                         | -19.8%                            |
| Chile                | 40.8%   | 17.1%    | 29.5%     | 4.4%    | 4.5%        | 3.8%     | 18729        | 0.24                         | -20.1%                            |
| China                | 48.6%   | 34.8%    | 8.4%      | 3.4%    | 3.8%        | 1.0%     | 1392730      | 27.74                        | -23.9%                            |
| Colombia             | 19.8%   | 25.4%    | 37.6%     | 8.2%    | 4.3%        | 4.8%     | 49649        | 0.28                         | -36.5%                            |
| Croatia              | 25.0%   | 20.3%    | 36.4%     | 7.1%    | 8.6%        | 2.6%     | 4089         | 0.05                         | -32.9%                            |
| Cyprus               | 35.8%   | 16.9%    | 30.9%     | 2.2%    | 3.9%        | 10.2%    | 1189         | 0.03                         | -32.3%                            |
| Czech Republic       | 55.6%   | 13.3%    | 17.6%     | 4.3%    | 8.0%        | 1.2%     | 10626        | 0.29                         | -23.7%                            |
| Denmark              | 30.9%   | 13.2%    | 36.8%     | 5.6%    | 5.5%        | 8.1%     | 5797         | 0.11                         | -33.9%                            |
| Egypt                | 42.2%   | 23.1%    | 24.6%     | 1.4%    | 7.3%        | 1.4%     | 98424        | 0.66                         | -16.7%                            |
| Estonia              | 69.7%   | 5.3%     | 19.6%     | 3.4%    | 0.9%        | 1.0%     | 1321         | 0.06                         | -12.5%                            |
| Finland              | 42.9%   | 17.3%    | 26.4%     | 6.1%    | 2.5%        | 4.8%     | 5518         | 0.14                         | -19.8%                            |
| France               | 17.6%   | 14.1%    | 38.2%     | 11.0%   | 12.7%       | 6.4%     | 66987        | 1.00                         | -34%                              |
| Germany              | 42.7%   | 14.0%    | 22.0%     | 6.0%    | 11.4%       | 4.0%     | 82928        | 2.18                         | -26.4%                            |
| Greece               | 44.4%   | 12.7%    | 30.2%     | 2.0%    | 6.1%        | 4.6%     | 10728        | 0.23                         | -27.3%                            |
| Hungary              | 28.9%   | 16.9%    | 27.2%     | 9.1%    | 16.5%       | 1.4%     | 9769         | 0.14                         | -27.1%                            |
| India                | 49.5%   | 29.4%    | 12.4%     | 3.9%    | 3.7%        | 1.1%     | 1352617      | 7.32                         | -25.7%                            |
| Indonesia            | 41.2%   | 25.0%    | 25.1%     | 2.0%    | 4.1%        | 2.6%     | 267663       | 1.70                         | -18.2%                            |
| Iran                 | 33.9%   | 19.4%    | 22.9%     | 4.9%    | 18.1%       | 0.8%     | 81800        | 2.01                         | -15.3%                            |
| Iraq                 | 63.1%   | 8.8%     | 20.3%     | 0.0%    | 6.4%        | 1.4%     | 38434        | 0.57                         | -23.2%                            |
| Ireland              | 29.3%   | 14.4%    | 29.4%     | 6.1%    | 13.6%       | 7.3%     | 4854         | 0.12                         | -30.6%                            |
| Israel               | 56.1%   | 9.1%     | 26.5%     | 3.1%    | 0.5%        | 4.8%     | 8884         | 0.19                         | -29.1%                            |
| Italy                | 34.9%   | 11.4%    | 29.6%     | 7.0%    | 13.4%       | 3.6%     | 60431        | 0.98                         | -27.7%                            |
| Japan                | 49.4%   | 19.4%    | 17.5%     | 6.2%    | 4.9%        | 2.6%     | 126529       | 3.28                         | -26.3%                            |
| Kazakhstan           | 58.5%   | 25.5%    | 5.6%      | 3.6%    | 6.1%        | 0.7%     | 18276        | 0.89                         | -10.3%                            |
| South Korea          | 54.2%   | 14.4%    | 19.7%     | 3.6%    | 5.2%        | 2.8%     | 51635        | 1.94                         | -14.7%                            |
| Kuwait               | 58.9%   | 20.5%    | 16.7%     | 0.0%    | 0.9%        | 3.0%     | 4137         | 0.29                         | -14.3%                            |
| Latvia               | 18.8%   | 12.7%    | 48.5%     | 9.4%    | 5.5%        | 5.0%     | 1927         | 0.02                         | -26.3%                            |
| Lithuania            | 21.5%   | 13.2%    | 51.8%     | 4.7%    | 6.2%        | 2.6%     | 2790         | 0.04                         | -35.6%                            |
| Luxembourg           | 2.5%    | 12.3%    | 53.1%     | 5.9%    | 10.2%       | 16.0%    | 608          | 0.03                         | -44.6%                            |
| Malaysia             | 47.6%   | 18.3%    | 26.2%     | 2.4%    | 1.3%        | 4.2%     | 31529        | 0.73                         | -30.3%                            |
| Malta                | 8.2%    | 0.6%     | 84.7%     | 1.2%    | 0.5%        | 4.8%     | 484          | 0.02                         | -24.5%                            |
| Mexico               | 40.6%   | 18.3%    | 32.1%     | 3.1%    | 3.5%        | 2.5%     | 126191       | 1.35                         | -20.1%                            |
| Morocco              | 32.9%   | 23.2%    | 26.3%     | 4.6%    | 9.7%        | 3.3%     | 36029        | 0.19                         | -29.5%                            |
| Netherlands          | 33.2%   | 12.8%    | 32.9%     | 7.3%    | 8.0%        | 5.8%     | 17231        | 0.58                         | -19.2%                            |
| New Zealand          | 18.7%   | 18.6%    | 41.8%     | 6.8%    | 1.6%        | 12.6%    | 4886         | 0.11                         | -41.1%                            |
| Nigeria              | 26.1%   | 15.8%    | 53.5%     | 0.9%    | 1.9%        | 1.9%     | 195875       | 0.36                         | -26.5%                            |
| Norway               | 37.4%   | 18.8%    | 30.9%     | 5.2%    | 0.6%        | 7.1%     | 5314         | 0.13                         | -34.2%                            |
| Oman                 | 35.0%   | 25.6%    | 21.6%     | 15.8%   | 0.8%        | 1.3%     | 4829         | 0.20                         | -17.9%                            |
| Pakistan             | 27.9%   | 33.3%    | 26.8%     | 2.3%    | 8.2%        | 1.4%     | 212215       | 0.62                         | -30.6%                            |
| Philippines          | 45.4%   | 19.4%    | 23.5%     | 5.0%    | 2.2%        | 4.4%     | 106652       | 0.38                         | -19%                              |
| Poland               | 50.4%   | 11.9%    | 19.7%     | 5.7%    | 11.4%       | 0.8%     | 37979        | 0.95                         | -23.4%                            |
| Portugal             | 41.1%   | 13.8%    | 31.3%     | 3.7%    | 2.9%        | 7.3%     | 10282        | 0.16                         | -31.9%                            |
| Qatar                | 58.2%   | 17.0%    | 14.8%     | 0.0%    | 0.4%        | 9.6%     | 2782         | 0.32                         | -18.6%                            |
| Romania              | 41.0%   | 20.1%    | 23.4%     | 5.4%    | 8.7%        | 1.4%     | 19474        | 0.21                         | -27.3%                            |
| Russian Federation   | 51.9%   | 17.5%    | 16.6%     | 2.0%    | 10.0%       | 2.0%     | 144478       | 4.85                         | -23.2%                            |
| Saudi Arabia         | 47.8%   | 26.2%    | 22.8%     | 0.0%    | 0.9%        | 2.2%     | 33700        | 1.77                         | -28.9%                            |
| Slovakia             | 35.2%   | 27.1%    | 23.1%     | 5.7%    | 8.5%        | 0.4%     | 5447         | 0.10                         | -16.7%                            |
| Slovenia             | 34.3%   | 15.0%    | 41.3%     | 4.1%    | 4.7%        | 0.5%     | 2067         | 0.04                         | -21.2%                            |
| South Africa         | 63.6%   | 11.6%    | 13.2%     | 4.5%    | 5.2%        | 1.9%     | 57780        | 1.32                         | -22.4%                            |
| Spain                | 33.2%   | 13.3%    | 35.8%     | 5.4%    | 5.7%        | 6.6%     | 46724        | 0.83                         | -31.9%                            |
| Sweden               | 19.9%   | 16.2%    | 54.1%     | 2.9%    | 0.3%        | 6.5%     | 10183        | 0.14                         | -27.6%                            |
| Thailand             | 37.4%   | 24.0%    | 27.4%     | 3.7%    | 1.6%        | 5.8%     | 69429        | 0.84                         | -21.4%                            |
| Turkey               | 36.9%   | 24.7%    | 19.1%     | 7.9%    | 8.1%        | 3.3%     | 82320        | 1.21                         | -17.4%                            |
| Turkmenistan         | 36.1%   | 5.1%     | 16.4%     | 39.7%   | 0.6%        | 2.0%     | 5851         | 0.22                         | -4.5%                             |
| Ukraine              | 49.1%   | 19.9%    | 14.5%     | 3.5%    | 12.5%       | 0.4%     | 44623        | 0.62                         | -12.4%                            |
| United Arab Emirates | 33.2%   | 25.7%    | 31.8%     | 0.0%    | 0.4%        | 9.0%     | 9631         | 0.76                         | -21.5%                            |
| United Kingdom       | 28.2%   | 10.2%    | 31.4%     | 5.6%    | 15.6%       | 8.9%     | 66489        | 1.16                         | -30.7%                            |
| USA                  | 41.7%   | 9.5%     | 32.8%     | 5.2%    | 5.8%        | 5.0%     | 327167       | 15.28                        | -31.6%                            |
| Uzbekistan           | 50.9%   | 14.8%    | 5.7%      | 7.3%    | 21.0%       | 0.4%     | 32955        | 0.25                         | -17.3%                            |
| Venezuela            | 43.1%   | 22.1%    | 29.7%     | 1.0%    | 3.1%        | 0.9%     | 28870        | 0.39                         | -29.5%                            |
| Vietnam              | 31.9%   | 42.0%    | 16.3%     | 3.1%    | 4.5%        | 2.2%     | 95540        | 0.6                          | -30%                              |

Table S16 (continued).

|                        | Country name         | Power   | Industry | Transport | Commerce | Residential | Aviation | Population   | CO <sub>2</sub> emissions   | Reduced CO <sub>2</sub> emissions |
|------------------------|----------------------|---------|----------|-----------|----------|-------------|----------|--------------|-----------------------------|-----------------------------------|
|                        |                      | percent | percent  | percent   | percent  | percent     | percent  | (000s; 2018) | (MCO <sub>2</sub> /d; 2017) | percent                           |
| C<br>H<br>I<br>N<br>A  | Beijing              | 34%     | 5%       | 29%       | 12%      | 20%         | 0.4%     | 2154         | 0.2                         | -24.6%                            |
|                        | Tianjin              | 45%     | 37%      | 6%        | 5%       | 6%          | 1%       | 1560         | 0.4                         | -24.7%                            |
|                        | Hebei                | 32%     | 57%      | 3%        | 2%       | 6%          | 1%       | 7556         | 1.9                         | -27%                              |
|                        | Shanxi               | 57%     | 32%      | 4%        | 2%       | 4%          | 1%       | 3718         | 1.3                         | -23.1%                            |
|                        | Inner Mongolia       | 77%     | 15%      | 3%        | 2%       | 2%          | 2%       | 2534         | 1.7                         | -20.1%                            |
|                        | Liaoning             | 45%     | 39%      | 8%        | 3%       | 4%          | 1%       | 4359         | 1.3                         | -26%                              |
|                        | Jilin                | 55%     | 28%      | 7%        | 5%       | 3%          | 2%       | 2704         | 0.5                         | -24.5%                            |
|                        | Heilongjiang         | 54%     | 19%      | 8%        | 11%      | 4%          | 5%       | 3773         | 0.7                         | -25.7%                            |
|                        | Shanghai             | 33%     | 25%      | 27%       | 8%       | 7%          | 1%       | 2424         | 0.5                         | -29.7%                            |
|                        | Jiangsu              | 60%     | 30%      | 6%        | 0%       | 3%          | 1%       | 8051         | 1.9                         | -23.2%                            |
|                        | Zhejiang             | 70%     | 12%      | 9%        | 3%       | 5%          | 2%       | 5737         | 1.0                         | -21.1%                            |
|                        | Anhui                | 61%     | 25%      | 7%        | 2%       | 5%          | 1%       | 6324         | 0.9                         | -22.4%                            |
|                        | Fujian               | 57%     | 27%      | 11%       | 1%       | 3%          | 1%       | 3941         | 0.6                         | -24.7%                            |
|                        | Jiangxi              | 47%     | 38%      | 7%        | 2%       | 4%          | 1%       | 4648         | 0.5                         | -25.3%                            |
|                        | Shandong             | 60%     | 27%      | 6%        | 2%       | 4%          | 1%       | 10047        | 2.1                         | -22.6%                            |
|                        | Henan                | 56%     | 30%      | 6%        | 2%       | 5%          | 1%       | 9605         | 1.2                         | -23.3%                            |
|                        | Hubei                | 42%     | 31%      | 12%       | 6%       | 7%          | 2%       | 5917         | 0.8                         | -26.6%                            |
|                        | Hunan                | 26%     | 46%      | 11%       | 8%       | 7%          | 4%       | 6899         | 0.8                         | -30%                              |
|                        | Guangdong            | 58%     | 16%      | 14%       | 3%       | 8%          | 1%       | 11346        | 1.4                         | -22.6%                            |
|                        | Guangxi              | 37%     | 46%      | 11%       | 1%       | 3%          | 2%       | 4926         | 0.5                         | -28.6%                            |
| Hainan                 | 60%                  | 10%     | 17%      | 5%        | 4%       | 5%          | 934      | 0.1          | -25.7%                      |                                   |
| Chongqing              | 40%                  | 35%     | 14%      | 3%        | 7%       | 1%          | 3102     | 0.4          | -27.1%                      |                                   |
| Sichuan                | 17%                  | 56%     | 11%      | 6%        | 9%       | 2%          | 8341     | 0.7          | -30.4%                      |                                   |
| Guizhou                | 55%                  | 11%     | 6%       | 18%       | 8%       | 2%          | 3600     | 0.6          | -22.4%                      |                                   |
| Yunnan                 | 20%                  | 54%     | 14%      | 4%        | 7%       | 3%          | 4830     | 0.4          | -31.6%                      |                                   |
| Shaanxi                | 57%                  | 29%     | 5%       | 3%        | 5%       | 1%          | 3864     | 0.7          | -22.7%                      |                                   |
| Gansu                  | 56%                  | 25%     | 7%       | 4%        | 7%       | 2%          | 2637     | 0.4          | -22.8%                      |                                   |
| Qinghai                | 36%                  | 42%     | 8%       | 6%        | 7%       | 1%          | 603      | 0.1          | -13.2%                      |                                   |
| Ningxia                | 76%                  | 20%     | 2%       | 1%        | 1%       | 0.2%        | 688      | 0.5          | -19.8%                      |                                   |
| Xinjiang               | 66%                  | 22%     | 5%       | 2%        | 4%       | 2%          | 2487     | 1.1          | -10.4%                      |                                   |
| international aviation |                      | 0%      | 0%       | 0%        | 0%       | 0%          | 100%     | -            | 0.1                         | -75%                              |
| international shipping |                      | 0%      | 0%       | 100%      | 0%       | 0%          | 0%       | -            | 0.1                         | -20%                              |
| U<br>S<br>A            | Alabama              | 47%     | 19%      | 30%       | 2%       | 2%          | 1%       | 4888         | 0.3                         | -29.8%                            |
|                        | Alaska               | 7%      | 48%      | 19%       | 6%       | 5%          | 15%      | 737          | 0.1                         | -40.4%                            |
|                        | Arizona              | 51%     | 5%       | 37%       | 3%       | 2%          | 2%       | 7172         | 0.2                         | -29.9%                            |
|                        | Arkansas             | 50%     | 13%      | 30%       | 5%       | 2%          | 1%       | 3014         | 0.2                         | -17.9%                            |
|                        | California           | 9%      | 19%      | 50%       | 5%       | 7%          | 10%      | 39557        | 1.0                         | -41.8%                            |
|                        | Colorado             | 40%     | 14%      | 29%       | 5%       | 8%          | 4%       | 5696         | 0.2                         | -29.3%                            |
|                        | Connecticut          | 19%     | 5%       | 44%       | 12%      | 19%         | 1%       | 3573         | 0.1                         | -30.4%                            |
|                        | Delaware             | 24%     | 24%      | 38%       | 8%       | 7%          | 0%       | 967          | 0.0                         | -33.1%                            |
|                        | District of Columbia | 0%      | 1%       | 38%       | 36%      | 25%         | 0%       | 702          | 0.0                         | -30%                              |
|                        | Florida              | 45%     | 5%       | 43%       | 3%       | 1%          | 4%       | 21299        | 0.6                         | -33.6%                            |
|                        | Georgia              | 39%     | 9%       | 42%       | 3%       | 5%          | 1%       | 10519        | 0.4                         | -31.9%                            |
|                        | Hawaii               | 32%     | 8%       | 58%       | 3%       | 0%          | 0%       | 1420         | 0.0                         | -37.1%                            |
|                        | Idaho                | 6%      | 18%      | 57%       | 8%       | 10%         | 2%       | 1754         | 0.1                         | -38.6%                            |
|                        | Illinois             | 32%     | 17%      | 30%       | 7%       | 11%         | 4%       | 12741        | 0.6                         | -30.2%                            |
|                        | Indiana              | 46%     | 23%      | 22%       | 3%       | 4%          | 2%       | 6692         | 0.5                         | -28.1%                            |
|                        | Iowa                 | 34%     | 29%      | 26%       | 5%       | 6%          | 0.4%     | 3156         | 0.2                         | -17.9%                            |
|                        | Kansas               | 37%     | 22%      | 30%       | 4%       | 6%          | 1%       | 2912         | 0.2                         | -30%                              |
|                        | Kentucky             | 56%     | 11%      | 25%       | 2%       | 2%          | 3%       | 4468         | 0.3                         | -27.8%                            |
|                        | Louisiana            | 15%     | 60%      | 19%       | 1%       | 1%          | 4%       | 4660         | 0.6                         | -36.3%                            |
|                        | Maine                | 7%      | 9%       | 53%       | 11%      | 19%         | 2%       | 1338         | 0.0                         | -34.5%                            |
|                        | Maryland             | 23%     | 4%       | 52%       | 10%      | 10%         | 1%       | 6043         | 0.1                         | -34.2%                            |
|                        | Massachusetts        | 16%     | 5%       | 43%       | 12%      | 19%         | 5%       | 6902         | 0.2                         | -32.2%                            |
|                        | Michigan             | 37%     | 12%      | 32%       | 7%       | 12%         | 1%       | 9996         | 0.4                         | -27.7%                            |
|                        | Minnesota            | 29%     | 19%      | 34%       | 8%       | 10%         | 1%       | 5611         | 0.2                         | -30.8%                            |
|                        | Mississippi          | 35%     | 16%      | 36%       | 2%       | 2%          | 9%       | 2987         | 0.2                         | -36%                              |
|                        | Missouri             | 56%     | 6%       | 30%       | 3%       | 4%          | 1%       | 6126         | 0.3                         | -26.8%                            |
|                        | Montana              | 51%     | 13%      | 25%       | 5%       | 6%          | 1%       | 1062         | 0.1                         | -26.7%                            |
|                        | Nebraska             | 43%     | 19%      | 28%       | 4%       | 5%          | 1%       | 1929         | 0.1                         | -29%                              |
|                        | Nevada               | 35%     | 9%       | 38%       | 7%       | 7%          | 5%       | 3034         | 0.1                         | -32.7%                            |
|                        | New Hampshire        | 13%     | 6%       | 49%       | 10%      | 21%         | 1%       | 1356         | 0.0                         | -31.9%                            |
|                        | New Jersey           | 16%     | 8%       | 44%       | 10%      | 14%         | 8%       | 8909         | 0.3                         | -36%                              |
|                        | New Mexico           | 47%     | 15%      | 30%       | 3%       | 4%          | 1%       | 2095         | 0.1                         | -28.8%                            |
|                        | New York             | 14%     | 5%       | 41%       | 14%      | 20%         | 6%       | 19542        | 0.4                         | -32.7%                            |
|                        | North Carolina       | 41%     | 8%       | 42%       | 4%       | 4%          | 1%       | 10384        | 0.3                         | -31.7%                            |
|                        | North Dakota         | 52%     | 29%      | 15%       | 2%       | 2%          | 0.4%     | 760          | 0.2                         | -13.7%                            |
|                        | Ohio                 | 39%     | 17%      | 29%       | 5%       | 8%          | 2%       | 11689        | 0.6                         | -28.9%                            |
|                        | Oklahoma             | 33%     | 26%      | 32%       | 3%       | 4%          | 3%       | 3943         | 0.3                         | -21.1%                            |
|                        | Oregon               | 20%     | 12%      | 50%       | 7%       | 8%          | 4%       | 4191         | 0.1                         | -36.8%                            |
|                        | Pennsylvania         | 36%     | 22%      | 27%       | 5%       | 9%          | 3%       | 12807        | 0.6                         | -29.5%                            |
|                        | Rhode Island         | 28%     | 6%       | 40%       | 9%       | 18%         | 0%       | 1057         | 0.0                         | -27.9%                            |
|                        | South Carolina       | 36%     | 11%      | 47%       | 3%       | 2%          | 1%       | 5084         | 0.2                         | -23.5%                            |
|                        | South Dakota         | 17%     | 26%      | 44%       | 5%       | 7%          | 1%       | 882          | 0.0                         | -24.4%                            |
|                        | Tennessee            | 33%     | 16%      | 40%       | 4%       | 4%          | 4%       | 6770         | 0.3                         | -34.5%                            |
|                        | Texas                | 30%     | 34%      | 29%       | 2%       | 1%          | 4%       | 28702        | 1.8                         | -34.3%                            |
|                        | Utah                 | 47%     | 12%      | 27%       | 5%       | 7%          | 3%       | 3161         | 0.2                         | -18.4%                            |
|                        | Vermont              | 0%      | 7%       | 56%       | 13%      | 23%         | 0%       | 626          | 0.0                         | -33.8%                            |
|                        | Virginia             | 29%     | 11%      | 45%       | 6%       | 6%          | 3%       | 8518         | 0.3                         | -34.8%                            |
|                        | Washington           | 13%     | 13%      | 52%       | 6%       | 8%          | 8%       | 7536         | 0.2                         | -40.2%                            |
| West Virginia          | 72%                  | 12%     | 13%      | 2%        | 2%       | 0%          | 1806     | 0.2          | -21.8%                      |                                   |
| Wisconsin              | 42%                  | 14%     | 29%      | 6%        | 9%       | 1%          | 5814     | 0.3          | -27.4%                      |                                   |
| Wyoming                | 67%                  | 17%     | 12%      | 2%        | 2%       | 0.4%        | 578      | 0.2          | -11.6%                      |                                   |
| international aviation |                      | 0%      | 0%       | 0%        | 0%       | 0%          | 100%     | -            | 0.2                         | -75%                              |
| international shipping |                      | 0%      | 0%       | 100%      | 0%       | 0%          | 0%       | -            | 0.2                         | -20%                              |

## References

- 1 Friedlingstein, P. *et al.* Global Carbon Budget 2019. *Earth System Science Data* **11**, 1783-1838, doi:10.5194/essd-11-1783-2019 (2019).
- 2 IMF. World Economic Outlook, April 2020: Challenges to Steady Growth, available at: <https://www.imf.org/en/Publications/WEO/Issues/2020/04/14/weo-april-2020>, accessed 20 April 2020. (2020).
- 3 Peters, G. P. *et al.* Carbon dioxide emissions continue to grow amidst slowly emerging climate policies. *Nature Climate Change* **10**, 3-6, doi:10.1038/s41558-019-0659-6 (2020).
- 4 Hale, T., Webster, S., Petherick, A., Phillips, T. & Kira, B. *Oxford COVID-19 Government Response Tracker*, Blavatnik School of Government. Available at: <https://www.bsg.ox.ac.uk/research/research-projects/coronavirus-government-response-tracker>, accessed 20 April 2020. , 2020).
- 5 ENTSOE. *The European Network of Transmission System Operators Electricity Transparency Platform*, available at: <https://transparency.entsoe.eu/>, access 07 April 2020, 2020).
- 6 Spinoni, J., Vogt, J., Barbosa, P. European degree-day climatologies and trends for the period 1951-2011. *International Journal of Climatology*, **35**, 25-36 (2015).
- 7 Spinoni, J., Vogt, J. V., Barbosa, P., Dosio, A., McCormick, N., Bigano, A., Füssel, H.-M. (2018).
- 8 Copernicus. *Climate Change Service (C3S). ERA5: Fifth generation of ECMWF atmospheric reanalyses of the global climate . Copernicus Climate Change Service Climate Data Store (CDS), date of access: March 2020., 2017).*
- 9 Harris, I., Osborn, T. J., Jones, P., Lister, D. Version 4 of the CRU TS monthly high-resolution gridded multivariate climate dataset. 109 ( Scientific Data, 2020).
- 10 POSOCO. *Power System Operation Corporation Limited; National Load Despatch Centre Daily Reports*, available at: <https://posoco.in/reports/daily-reports/>, accessed 19 April 2020, 2020).
- 11 EIA. *Energy Information Administration; U.S. Electric System Operating Data*, available at: [https://www.eia.gov/realtime\\_grid/](https://www.eia.gov/realtime_grid/), accessed 07/04/2020, 2020).
- 12 Myllyvirta, L. *CarbonBrief Analysis: Coronavirus temporarily reduced China's CO2 emissions by a quarter*, accessed 09 April 2020, 2020).
- 13 EIA. *Energy Information Administration. Today in Energy*, available at: <https://www.eia.gov/todayinenergy/detail.php?id=29112>, accessed 07/04/2020, 2020).
- 14 American Iron and Steel Institute. *Steel Industry Data*; available at: <https://www.steel.org/industry-data>, accessed 19 April 2020. , 2020).
- 15 RTE. Réseau de transport d'électricité (France); L'impact de la crise sanitaire (COVID-19) sur le fonctionnement du système électrique. Available at: <https://www.rte-france.com/fr/document/impacts-de-la-crise-sanitaire-covid-19-sur-le-systeme-electrique>, accessed 19 April 2020. . (2020).
- 16 TOMTOM. *TOMTOM Traffic Index*, available at: [https://www.tomtom.com/en\\_gb/traffic-index/](https://www.tomtom.com/en_gb/traffic-index/), accessed 07 April 2020, 2020).
- 17 MS2. *MS2 Corporation ; Daily Traffic Volume Trends*, available at: <https://www.ms2soft.com/traffic-dashboard/>, accessed 07 April 2020, 2020).
- 18 Octopus. *Octopus Energy Tech; Energy consumption under social distancing measures*, available at: <https://tech.octopus.energy/data-discourse/2020-social-distancing/index.html>, accessed 09 April 2020, 2020).
- 19 Jungbluth, N. & Meili, C. Recommendations for calculation of the global warming potential of aviation including the radiative forcing index. *The International Journal of Life Cycle Assessment* **24**, 404-411, doi:10.1007/s11367-018-1556-3 (2019).
- 20 OAG. *Coronavirus Airline Schedules Data*, available at: <https://www.oag.com/coronavirus-airline-schedules-data>, accessed 07 April 2020, 2020).

- 21 Jaegle, L., Steinberger, L., Martin, R. V. & Chance, K. Global partitioning of NO<sub>x</sub> sources using satellite observations: Relative roles of fossil fuel combustion, biomass burning and soil emissions. *Faraday Discussions* **130**, 407-423, doi:10.1039/b502128f (2005).
- 22 Liu, F. *et al.* NO<sub>x</sub> lifetimes and emissions of cities and power plants in polluted background estimated by satellite observations. *Atmospheric Chemistry and Physics* **16**, 5283-5298, doi:10.5194/acp-16-5283-2016 (2016).
- 23 Silva, S. J. & Arellano, A. F. Characterizing Regional-Scale Combustion Using Satellite Retrievals of CO, NO<sub>2</sub> and CO<sub>2</sub>. *Remote Sensing* **9**, doi:10.3390/rs9070744 (2017).
- 24 Krotkov, N. A. *OMI/Aura NO<sub>2</sub> Cloud-Screened Total and Tropospheric Column L3 Global Gridded 0.25 degree x 0.25 degree V3, NASA Goddard Space Flight Center, Goddard Earth Sciences Data and Information Services Center (GES DISC), accessed: 04/04/2020, 2013.*
- 25 IEA. *International Energy Agency; World Energy Balances 2019 @IEA, [www.iea.org/statistics](http://www.iea.org/statistics), Licence: [www.iea.org/t&c](http://www.iea.org/t&c), access: 11/11/2019, 2019.*
- 26 Shan, Y. L., Huang, Q., Guan, D. B. & Hubacek, K. China CO<sub>2</sub> emission accounts 2016-2017. *Scientific Data* **7**, doi:10.1038/s41597-020-0393-y (2020).
